## COUPLED DYNAMICS OF BEHAVIOR AND DISEASE CONTAGION AMONG ANTAGONISTIC GROUPS

PAUL E. SMALDINO<sup>1,\*</sup> AND JAMES HOLLAND JONES<sup>2</sup>

February 6, 2021

1 **Abstract:** Disease transmission and behavior change are both fundamentally social phenom-  
2 ena. Behavior change can have profound consequences for disease transmission, and epidemic  
3 conditions can favor the more rapid adoption of behavioral innovations. We analyze a simple  
4 model of coupled behavior-change and infection in a structured population characterized by ho-  
5 mophily and outgroup aversion. Outgroup aversion slows the rate of adoption and can lead to  
6 lower rates of adoption in the later-adopting group or even behavioral divergence between groups  
7 when outgroup aversion exceeds positive ingroup influence. When disease dynamics are coupled  
8 to the behavior-adoption model, a wide variety of outcomes are possible. Homophily can either  
9 increase or decrease the final size of the epidemic depending on its relative strength in the two  
10 groups and on  $R_0$  for the infection. For example, if the first group is homophilous and the  
11 second is not, the second group will have a larger epidemic. Homophily and outgroup aversion  
12 can also produce dynamics suggestive of a “second wave” in the first group that follows the peak  
13 of the epidemic in the second group. Our simple model reveals dynamics that are suggestive  
14 of the processes currently observed under pandemic conditions in culturally and/or politically  
15 polarized populations such as the United States.

16  
17 **Keywords:** transmission dynamics; coupled contagion; homophily; outgroup aversion; social  
18 distancing

### 19 1. INTRODUCTION

20 Behavior can spread through communication and social learning like an infection  
21 through a community (Bass, 1969; Centola, 2018). Cavalli-Sforza and Feldman, who  
22 pioneered treating cultural transmission in an analogous manner to genetic transmission,  
23 noted that “another biological model may offer a more satisfactory interpretation of the  
24 diffusion of innovations. The model is that of an epidemic” (Cavalli-Sforza and Feldman,  
25 1981, 32-33). The biological success of *Homo sapiens* has been attributed to its capacity  
26 for cumulative culture, and particularly to the rapid and flexible adaptability that arises  
27 from social learning (Henrich, 2015). Adoption of adaptive behaviors during an epidemic  
28 of an infectious disease could be highly beneficial to both individuals and the population  
29 in which they are embedded (Fenichel et al., 2011). Coupling models of behavioral  
30 adoption and the transmission of infectious disease, what we call *coupled contagion*

---

<sup>1</sup>UNIVERSITY OF CALIFORNIA, MERCED

<sup>2</sup>STANFORD UNIVERSITY

*E-mail address:* paul.smaldino@ucmerced.edu.

31 models, may thus provide important insights for understanding dynamics and control of  
32 epidemics. While we might expect strong selection—both biological and cultural—for  
33 adaptive responses to epidemics, complications such as the potentially differing time  
34 scales of culture and disease transmission and the existence of social structures that  
35 shape adoption may complicate convergence to adaptive behavioral solutions.

36 In this paper, we explore the joint role of *homophily*—the tendency to form ties with  
37 people similar to oneself—and *outgroup aversion*—the tendency to avoid behaviors pref-  
38 erentially associated with an outgroup. Identity exerts a powerful force on the dynamics  
39 of behavior (Hogg and Abrams, 2007; Bishop, 2009; Mason, 2018; Smaldino, 2019; Klein,  
40 2020; Moya et al., 2020). This is because identity at least partly determines whom we  
41 associate with, communicate with, and strive to either emulate or avoid. Our analysis  
42 is predicated on the idea that this matters for the dynamics of infection. For exam-  
43 ple, Salathé and Bonhoeffer (2008) showed that if rates of vaccine adherence cluster on  
44 networks, as when communities collectively adopt identity-based positions on the likely  
45 costs and benefits of vaccination (Bauch and Earn, 2004) or when like-minded individu-  
46 als tend to assort in social networks (Bishop, 2009), the overall vaccination rates needed  
47 for herd immunity can be substantially higher than suggested by models that assume  
48 random vaccination.

49 Homophily involves interactions with ingroup members at rates higher than expected  
50 by chance. Homophily is often treated as though it were a global propensity for as-  
51 sortment by type (e.g. Centola, 2011). However, homophily is frequently observed to a  
52 greater or lesser degree across subgroups, a phenomenon known as differential homophily  
53 (Morris, 1991). Consider a case of two interacting groups, where one is more homophilous  
54 than the other. The less homophilous group may consist of more “frontline” workers,  
55 who are exposed to a broader cross-section of the population by nature of their work.  
56 In such cases, differential homophily may lead to differential disease dynamics in each  
57 group.

58 Members of opposed identity groups not only engage with the world differently, they  
59 can react in divergent ways to identical stimuli. Asked to watch political debates or hear  
60 political arguments, partisans often grow more strongly partisan, to the consternation of  
61 moderates (Taber et al., 2009). In the U.S., partisan identities have become increasingly  
62 defined in terms of their opposition to the opposing party (Abramowitz and Webster,  
63 2016). When considering the adoption of products, consumers often become disen-  
64 chanted with otherwise attractive purchases if the products are associated with identity  
65 groups viewed as different from their own (Berger and Heath, 2007, 2008). Smaldino  
66 et al. (2017) modeled the spread of a behavior among members of two groups who re-  
67 sponded positively to the behavioral contagion but tended to reject it if it was overly  
68 associated with the outgroup. They showed that outgroup aversion not only decreased  
69 the overall rate of adoption, but could also delay or even entirely suppress adoption in  
70 one of the groups. While populations vary in the extent to which they are polarized or  
71 parochial, identity clearly matters to the adoption of health behaviors in at least com-  
72 munities. For example, in the U.S., people who identify with the right-wing Republican  
73 party are much less likely than those identifying with the center-left Democratic party to

74 endorse mask-wearing or belief in its efficacy in preventing disease transmission during  
75 the COVID-19 pandemic (van Kessel and Quinn, 2020).

76 Several previous studies have considered the coupled contagion of behavior and infec-  
77 tion, usually focused on cases where the behavior is one that decreases the spread of the  
78 disease (such as social distancing or wearing face masks) and sometimes using the as-  
79 sumption that increased disease prevalence promotes the spread of the behavior (Tanaka  
80 et al., 2002; Epstein et al., 2008; Funk et al., 2010; Verelst et al., 2016; Fast et al., 2015;  
81 Fu et al., 2017; Hébert-Dufresne et al., 2020; Mehta and Rosenberg, 2020). These models  
82 typically assume that individuals differ only in behavior and disease status. Thus, the  
83 spread of both disease and behavior depend primarily on rates of behavior transmission  
84 and disease recovery. This is true even of models in which the population is structured on  
85 networks. Network structure can change the dynamics of contagion. However, contrary  
86 to the assumptions of most models, behavioral distributions on social networks are any-  
87 thing but random. People assort in highly non-random ways (McPherson et al., 2001)  
88 and these non-random associations both drive and are driven by social identity. This  
89 suggests that the role of social identity is an important, but under-studied, component  
90 of coupled contagion models.

91 Here, we consider how identity—and particularly homophilous interactions with in-  
92 group members and aversion to adopt behaviors used by an outgroup—influences the  
93 spread of novel behaviors that consequently affect the transmission of infectious disease.  
94 The model we will present is complex, and hence challenging to analyze. To help us  
95 make sense of the dynamics, we will first describe the dynamics of infection and behav-  
96 ior adoption in isolation, and then explore the full coupled model. We will first show how  
97 homophily can introduce temporal delays in the infection trajectories between groups.  
98 We will then show how outgroup aversion can lead to reduced or even fully inhibited  
99 behavior adoption by the later-adopting group. Finally, we will analyze the fully cou-  
100 pled model and show how the identity-driven forces we consider can lead differentiated  
101 identity groups to experience an epidemic in very different ways.

## 102 2. THE SIR MODEL OF INFECTION WITH HOMOPHILY

103 We model infection in a population in which individuals can be in one of three states:  
104 Susceptible, Infected, and Recovered. When susceptibles interact with infected individu-  
105 als, they become infected with a rate equal to the effective transmissibility of the disease,  
106  $\tau$ . Infected individuals recover with a constant probability  $\rho$  per infection per unit time.  
107 This is the well-known SIR model of epidemics (Kermack and McKendrick, 1927; Tolles  
108 and Luong, 2020). The baseline model assumes random interactions governed by mass  
109 action, and the dynamics are described by well-known differential equations. This model  
110 yields the classic dynamics in which the susceptible and recovered populations appear  
111 as nearly-mirrored sigmoids, while the rate of infected individuals rises and falls. The  
112 threshold for the epidemic is given by the basic reproduction number,  $R_0$ , which is a  
113 measure of the expected number of secondary cases caused by a single, typical primary

114 case at the outset of an epidemic in a population entirely composed of uninfected individ-  
115 uals. An epidemic occurs when  $R_0 > 1$ . For the basic SIR model in a closed population,  
116  $R_0 = \frac{\tau}{\rho}$ .

117 Our analysis will focus on scenarios where individuals assort based on identity. In  
118 this case, assume that individuals all belong to one of two identity groups, indicated  
119 with the subscript 1 or 2. Let  $w_i$  be the probability that interactions are with one's  
120 ingroup,  $i \in \{1, 2\}$ . It is therefore a measure of homophily; populations are homophilous  
121 when  $w_i > 0.5$ . It is important to recognize that groups can differ in their homophily  
122 (Morris, 1991). For example, if groups differ in socioeconomic class and group 1 tends  
123 to employ members of a group 2 as service workers, homophily will be higher for group  
124 1; a member of group 2 is more likely to encounter members of group 1 than the reverse.  
125 We can update the equations governing infection dynamics for members of group 1, with  
126 analogous equations governing members of group 2.

$$\begin{aligned}\frac{dS_1}{dt} &= -\tau S_1 (w_1 I_1 + (1 - w_1) I_2) \\ \frac{dI_1}{dt} &= \tau S_1 (w_1 I_1 + (1 - w_1) I_2) - \rho I_1 \\ \frac{dR_1}{dt} &= \rho I_1\end{aligned}$$

127 We assume the disease breaks out in one of the two groups, so the initial number  
128 of infected in group 1 is small but nonzero, while the initial number of infected in  
129 group 2 is exactly zero. Without loss of generality, we have assumed that group 1 is  
130 always infected first. When homophily is low, the model exhibits standard SIR dynamics  
131 approximating a single unified population. When an infection breaks out in group 1,  
132 homophily can delay the outbreak of the epidemic in group 2. Homophily for each group  
133 works somewhat synergistically, but the effect is dominated by  $w_2$ . This is because the  
134 infection spreads rapidly in a homophilous group 1, and if group 2 is not homophilous, its  
135 members will rapidly become infected. However, if group 2 is homophilous, its members  
136 can avoid the infection for longer, particularly when group 1 is also homophilous. If  
137 only group 2 is homophilous, the initial outbreak will be delayed, but the peak infection  
138 rate in group 2 can actually be higher than in group 1, as the infection is driven by  
139 interactions with both populations (Figure 1).

140 We also considered the case in which the transmissibility of the infection can be  
141 reduced to very near the recovery rate, so that  $R_0$  is very close to 1. In this case,  
142 homophily can protect groups where infection did not originally break out by keeping  
143 members relatively separated from the infection group (Figure S2).

### 144 3. BEHAVIORAL CONTAGION WITH OUTGROUP AVERSION

145 We model behavior adoption as a susceptible-infectious-susceptible (SIS) process, in  
146 which individuals can oscillate between adoption and non-adoption of the behavior indef-  
147 initely. We view this as more realistic than an SIR process for preventative-but-transient  
148 behaviors like social distancing or wearing face masks. To avoid confusion with infection

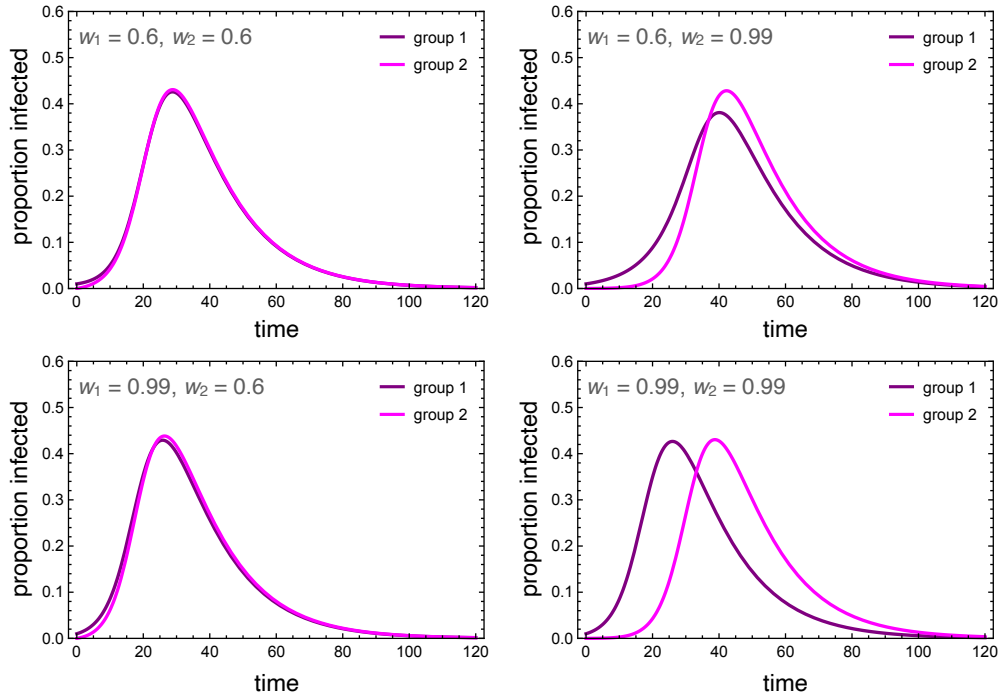

FIGURE 1. Dynamics of the infected population of each group under low and high homophily ( $w_i = 0.6, 0.99$ ). Other parameters used were  $\tau = 0.3$ ,  $\rho = 0.07$ ,  $I_1(0) = 0.01$ ,  $I_2(0) = 0$ .  $R_0 \approx 4.28$  in the absence of homophily.

149 status, we denote individuals who adopted the preventative behavior as Careful ( $C$ ),  
 150 and those who have not as Uncareful ( $U$ ). Unlike a disease, which is reasonably mod-  
 151 eled as equally transmissible between any susceptible-infected pairing, where behavior  
 152 is concerned, susceptible individuals are more likely to adopt when interacting with in-  
 153 group adopters, but less likely to adopt when interacting with outgroup adopters. We  
 154 model the behavioral dynamics for members of group 1 are as follows, with analogous  
 155 equations<sup>1</sup> governing members of group 2:

$$\begin{aligned}\frac{dU_1}{dt} &= -(\alpha_1 + \beta C_1)U_1 + (\gamma C_2 + \delta)C_1 \\ \frac{dC_1}{dt} &= (\alpha_1 + \beta C_1)U_1 - (\gamma C_2 + \delta)C_1\end{aligned}$$

156 Members of group  $i$  may spontaneously adopt the behavior independent of direct social  
 157 influence, and do so at rate  $\alpha_i$ . This adoption may be due to individual assessment of the

<sup>1</sup>Because all individuals have either adopted or not,  $U_1 = 1 - C_1$ , these coupled equations can be replaced by a single equation through substitutions. For intuitive reasons, we leave them as two coupled equations.

158 behavior's utility, to influences separate from peer mixing, such as from media sources,  
159 or to socioeconomic factors that make behavior adoption more or less easy for certain  
160 groups. For these reasons, we assume that groups can differ on their rates of spontaneous  
161 adoption. In reality, it is possible for groups to differ on all four model parameters, all of  
162 which can influence differences in adoption rates. For simplicity, we restrict our analysis  
163 to differences in spontaneous adoption.

164 Uncareful individuals are positively influenced to become careful by observing careful  
165 individuals of their own group, with strength  $\beta$ . However, this is countered by the force  
166 of outgroup aversion,  $\gamma$ , whereby individuals may cease being careful when they observe  
167 this behavior among members of the outgroup. The behavior is eventually discarded at  
168 rate  $\delta$ , representing financial and/or psychological costs of continuing to adopt preventive  
169 behaviors like social distancing or wearing face masks.

170 This model assumes no explicit homophily in terms of behavioral influence. On the  
171 one hand, it seems obvious that we observe and communicate with those in our own  
172 group more than other groups. On the other hand, opportunities for observing outgroup  
173 behaviors are abundant in a digitally-connected world, which alter the conditions for  
174 cultural evolution (Acerbi, 2019). For simplicity, we do not add explicit homophily terms  
175 to this system. Instead, we simply adjust the relative strengths of ingroup influence and  
176 outgroup aversion,  $\beta/\gamma$ . When this ratio is higher, it reflects stronger homophily for  
177 behavioral influence.

178 Numerical simulations that illustrate the influence of outgroup aversion are depicted  
179 in Figure 2. In all cases, the careful behavior is first adopted by group 1. In the absence  
180 of outgroup aversion, both groups adopt the behavior at saturation levels, with group 2  
181 being slightly delayed. When outgroup aversion is added, the delay increases, but more  
182 importantly, overall adoption declines for both groups. This decline continues as long as  
183 the strength of outgroup aversion is less than the strength of positive ingroup influence.  
184 A phase transition occurs here (Figure 2C,D). Although group 2 may initially adopt the  
185 behavior, adoption is subsequently suppressed, resulting in a polarizing behavior that is  
186 abundant in group 1 but nearly absent in group 2.

187 We also consider the case in which one group has a higher intrinsic adoption rate,  
188 which could be driven by differences in personality types, norms, or media exposure  
189 between the two groups. When  $\alpha_1 > \alpha_2$ , the equilibrium adoption rate for group 1  
190 could be considerably higher than for group 2, even when ingroup positive influence was  
191 greater than outgroup aversion (Figure 2E, F). Note that these differences arise entirely  
192 because of outgroup aversion. When  $\gamma = 0$ , both groups adopt at maximum levels.

193 Outgroup aversion has a strong influence on adoption dynamics. It can delay adoption,  
194 reduce equilibrium adoption rates, and even suppress adoption entirely in the later-  
195 adopting group. As we will see, when the behavior being adopted influences disease  
196 transmission, quite interesting dynamics can emerge.

#### 197 4. COUPLED CONTAGION WITH HOMOPHILY AND OUTGROUP AVERSION

198 Before we explore the coupled dynamics of this system, we must add one more consid-  
199 eration to the model. We focus on the adoption of preventative behaviors that decrease

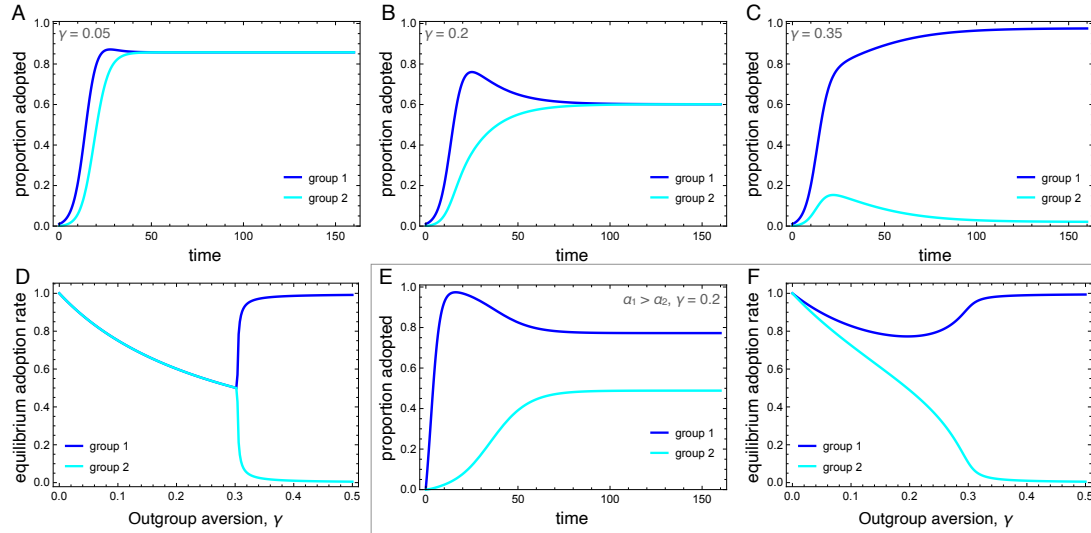

FIGURE 2. Dynamics of the behavioral adoption. (A-C) Behavior adoption dynamics in each group for different levels of outgroup aversion,  $\gamma$ . Parameters used were  $\alpha_1 = \alpha_2 = 0.001$ ,  $\beta = 0.3$ ,  $\delta = 0$ ,  $C_1(0) = 0.01$ ,  $C_2(0) = 0$ . (D) Equilibrium adoption rates for each group as a function of outgroup aversion,  $\gamma$ . A bifurcation occurs when outgroup aversion overpowers the forces of positive influence. (E) Behavior adoption dynamics for  $\gamma = 0.2$  where group 1 has a higher spontaneous adoption rate,  $\alpha_1 = 0.1$ . Here, the two groups converge to different equilibrium adoption rates. (F) Equilibrium adoption rates for each group as a function of outgroup aversion,  $\gamma$ , when  $\alpha_1 = 0.1$ .

200 the effective transmission rate of the infection, such as social distancing or wearing face  
 201 masks. We model this by asserting that the transmission rate is  $\tau_C$  for careful individuals  
 202 and  $\tau_U$  for uncared individuals, such that  $\tau_U \geq \tau_C$ . When considering the interaction  
 203 between careful and uncared individuals, we use the geometric mean, so the transmis-  
 204 sibility between SU and IU (that is, between susceptible and infected individuals who  
 205 are both uncared) is  $\sqrt{\tau_U \tau_C}$ . We use the geometric mean so that if either population  
 206 reduces its transmissibility to zero, transmission among its members becomes impossible.

The full model has six compartments, with two-letter abbreviations denoting the disease and behavioral state (Figure 3). The coupled dynamics for members of group 1 are as follows, with analogous equations governing members of group 2, such that the full system is defined by 12 coupled differential equations. A list of all parameters is



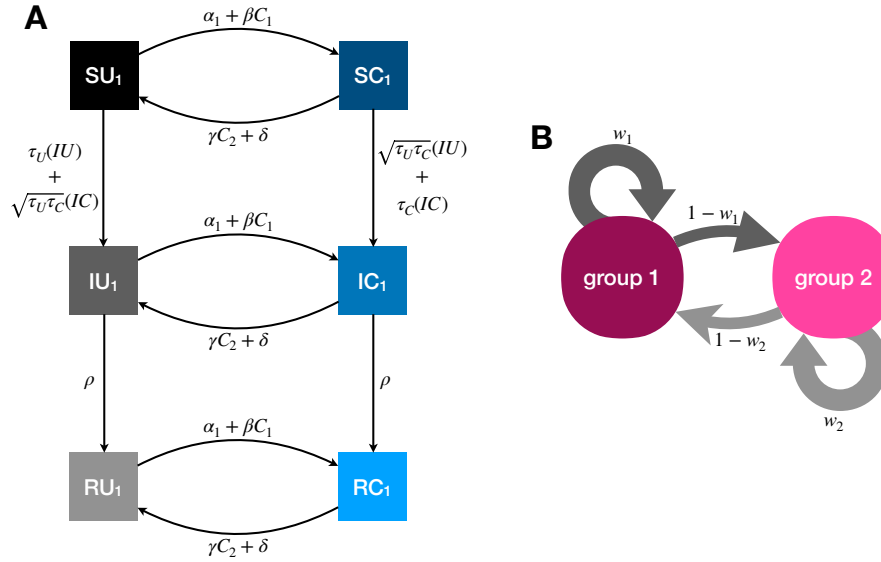

FIGURE 3. Illustration of the dynamics for the coupled contagion model. (A) Transition probabilities between compartments for members of group 1. For simplicity these probabilities do not include the influence of homophily. (B) homophilous interactions. Members of group  $i$  have physical contact with members of their own group with probability  $w_i$  and members of the outgroup with probability  $1 - w_i$ .

presented in Table 1.

$$\begin{aligned} \frac{d(SU_1)}{dt} &= [\delta + \gamma(SC_2 + IC_2 + RC_2)](SC_1) - [\alpha_1 + \beta(SC_1 + IC_1 + RC_1)](SU_1) - \\ &\quad \tau_U(SU_1)[w_1(IU_1) + (1 - w_1)IU_2] - \sqrt{\tau_U \tau_C}(SU_1)[w_1(IC_1 + (1 - w_1)IC_2)] \\ \frac{d(SC_1)}{dt} &= -[\delta + \gamma(SC_2 + IC_2 + RC_2)](SC_1) + [\alpha_1 + \beta(SC_1 + IC_1 + RC_1)](SU_1) - \\ &\quad \sqrt{\tau_U \tau_C}(SC_1)[w_1(IU_1) + (1 - w_1)IU_2] - \tau_C(SC_1)[w_1(IC_1 + (1 - w_1)IC_2)] \\ \frac{d(IU_1)}{dt} &= [\delta + \gamma(SC_2 + IC_2 + RC_2)](IC_1) - [\alpha_1 + \beta(SC_1 + IC_1 + RC_1)](IU_1) + \\ &\quad \tau_U(SU_1)[w_1(IU_1) + (1 - w_1)IU_2] + \sqrt{\tau_U \tau_C}(SU_1)[w_1(IC_1 + (1 - w_1)IC_2)] - \rho(IU_1) \\ \frac{d(IC_1)}{dt} &= -[\delta + \gamma(SC_2 + IC_2 + RC_2)](IC_1) + [\alpha_1 + \beta(SC_1 + IC_1 + RC_1)](IU_1) + \\ &\quad \sqrt{\tau_U \tau_C}(SC_1)[w_1(IU_1) + (1 - w_1)IU_2] + \tau_C(SC_1)[w_1(IC_1 + (1 - w_1)IC_2)] - \rho(IC_1) \\ \frac{d(RU_1)}{dt} &= [\delta + \gamma(SC_2 + IC_2 + RC_2)](RC_1) - [\alpha_1 + \beta(SC_1 + IC_1 + RC_1)](RU_1) + \rho(IU_1) \\ \frac{d(RC_1)}{dt} &= -[\delta + \gamma(SC_2 + IC_2 + RC_2)](RC_1) + [\alpha_1 + \beta(SC_1 + IC_1 + RC_1)](RU_1) + \rho(IC_1) \end{aligned}$$



TABLE 1. Model parameters.

| Parameter  | Definition                                          |
|------------|-----------------------------------------------------|
| $\tau_C$   | disease transmissibility for careful individuals    |
| $\tau_U$   | disease transmissibility for uncaredful individuals |
| $\rho$     | disease recovery rate                               |
| $w_i$      | homophily for group $i$                             |
| $\alpha_i$ | spontaneous behavior adoption rate for group $i$    |
| $\beta$    | ingroup positive influence on behavior              |
| $\gamma$   | outgroup negative influence on behavior             |
| $\delta$   | behavior discard rate                               |

207 Behavioral adoption is independent of infection status in this model. This may not  
208 be a realistic assumptions for some systems, such as Ebola, where the both the infec-  
209 tion status of the adopter and the perceived incidence in the population are likely to  
210 influence behavior. The assumption seems more realistic for infections like influenza  
211 and COVID-19, where infection status is not always transparent and decisions are likely  
212 to be made on the basis of more abstract socially-transmitted information. There are  
213 intermediate cases, however, such as where media reports of disease prevalence or the  
214 perceived availability may influence the adoption of preventative behaviors (Lau et al.,  
215 2010; Zhang et al., 2015; Seale et al., 2020). We do not consider such cases here.

216 To make the behavioral adoption most meaningful, we focus on the case where in-  
217 stantaneous and universal adoption of the careful behavior would decrease the disease  
218 transmissibility so that  $R_0 < 1$ . That is, if everyone immediately adopted the behavior,  
219 the epidemic would fizzle out. However, behavior adoption does not typically work this  
220 way. We have already noted that under assumptions of between-group variation and  
221 outgroup aversion, a behavior is likely to be adopted neither instantaneously nor uni-  
222 versally. The question we tackle now is how those socially-driven facets of behavioral  
223 adoption influence disease dynamics.

224 Figure 4 illustrates the wide range of possible disease dynamics under varying as-  
225 sumptions of homophily and outgroup aversion. A wider range of homophily values are  
226 explored in the Supplemental Materials (Figures S4, S5). In the absence of either ho-  
227 mophily or outgroup aversion, our results mirror previous work on coupled contagion in  
228 which the adoption of inhibitory behaviors reduces peak infection rates, flattening the  
229 curve of infection. Due to differences in spontaneous adoption rates, however, group  
230 2 may see a higher peak infection rate even when the infection breaks out in group 1,  
231 because the inhibitory behavior spreads more slowly in that group (Figure 4A).

232 Homophilous interactions further lower infection rates. If group 1 alone is homophilous,  
233 the infection rate declines in that group, while peak infections actually increase in group  
234 2 (Figure 4C). This is because group 1 adopts the careful behavior early, decreasing their  
235 transmission rate and simultaneously avoiding contact with the less careful members of  
236 group 2, who become infected through their frequent contact with group 1. If group 2  
237 alone is homophilous, on the other hand, the infection is staved off even more so than if  
238 both groups are homophilous (Figure 4B, D). This is because members of group 2 avoid

239 contact with group 1 until the careful behavior has been widely adopted, while members  
240 of group 1 diffuse their interactions with some members of group 2, and these are less  
241 likely to lead to new infections.

242 Outgroup aversion considerably changes these dynamics. First and foremost, outgroup  
243 aversion leads to less widespread adoption of careful behaviors, dramatically increasing  
244 the size of the epidemic. Moreover, because under many circumstances there will be  
245 between-group differences in equilibrium behavior-adoption rates, this can lead to dra-  
246 matic group differences in infection dynamics. In the absence of outgroup aversion, we  
247 saw that homophily in group 2 could lead to an almost total suppression of the epidemic.  
248 Not so with outgroup aversion, in which the peak infection rates *increase* relative to the  
249 low homophily case (Figure 4E, F). This occurs because homophily causes a delay in  
250 the infection onset in group 2. Behavioral adoption slows the epidemic initially in both  
251 groups. However, when the infection finally reaches group 1, behavioral adoption has  
252 decreased past its maximum due to the outgroup aversion, causing peak infections in  
253 both groups to soar.

254 The dynamics are particularly interesting for the case where the group in which the  
255 epidemic first breaks out (group 1 in our analyses) is also strongly homophilous. Due  
256 to homophily along with rapid behavior adoption, the epidemic is initially suppressed  
257 in this group. However, due to slower and incomplete behavior adoption, the infection  
258 spreads rapidly in group 2. As the infection peaks in group 2 while group 1 decreases  
259 its behavior adoption rate, we observe a delayed “second wave” of infection in group 1,  
260 well after the infection has peaked in group 2 (Figure 4G). This effect is exacerbated  
261 when both groups are homophilous, as the epidemic runs rampant in the less careful  
262 group 2 (Figure 4H). As shown in the Supplementary Material, the timing of the second  
263 wave is also delayed to a greater extent when the adopted behavior is more efficacious  
264 at reducing transmission (Figure S6).

265 We explored the differences in the timing of the infection peaks between the two  
266 groups, as illustrated in Figure 5. As noted, homophily in group 1 has a larger effect than  
267 homophily in group 2 because the infection first breaks out in group 1. Without outgroup  
268 aversion, the infection peak in group 1 is usually closely timed to the infection peak in  
269 group 2, usually coming slightly later due to group 2’s lagged adoption of the preventative  
270 behavior (Figure 5A). If group 1 has very strong homophily, however, the infection can  
271 peak earlier there, as its spread to group 2 is impeded. When outgroup aversion is strong,  
272 however, group 2’s adoption of the preventative behavior is severely impeded, which cases  
273 its infection rate to peak much earlier than in group 1, and this effect is only bolstered  
274 by strong homophily in group 1 (Figure 5B). The effect of outgroup aversion on the  
275 differential timing between groups of infection rate peaks is non-monotonic (Figure 5C),  
276 peaking at intermediate values of  $\gamma$ .

## 5. DISCUSSION

278 It is well known that disease transmission is influenced by behavior. What is often  
279 overlooked is how behavior itself changes within heterogeneous cultural populations.

COUPLED DYNAMICS OF BEHAVIOR AND DISEASE

11

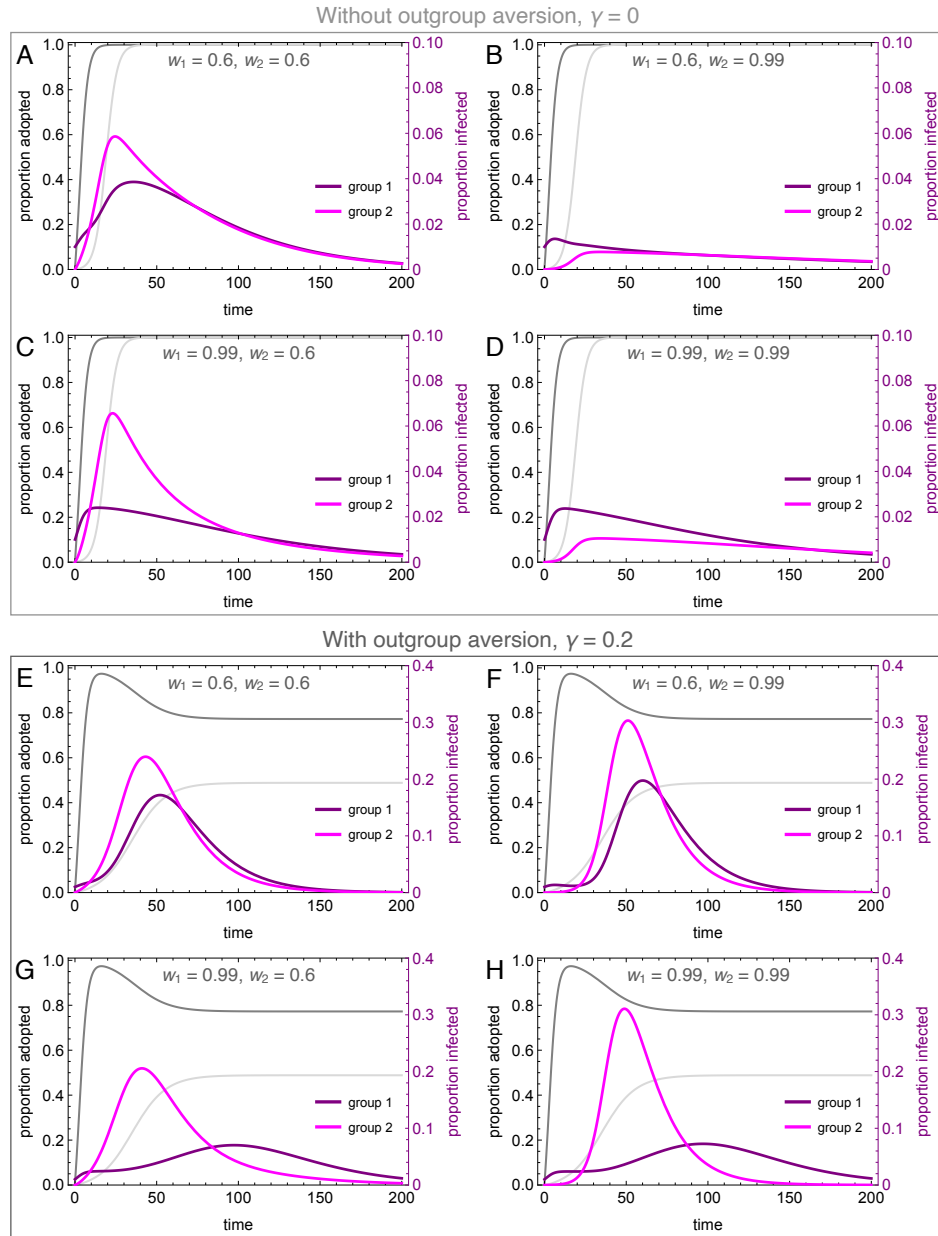

FIGURE 4. Coupled contagion dynamics when the behavior leads to highly effective reduction in transmissibility, under varying conditions of homophily and outgroup aversion. Notice difference in y-axis scale for infection rate between top and bottom sets of graphs. Parameters used:  $\tau_U = 0.3$ ,  $\tau_C = 0.069$ ,  $\rho = 0.07$ ,  $\alpha_1 = 0.1$ ,  $\alpha_2 = 0.001$ ,  $\beta = 0.3$ ,  $\delta = 0$ ,  $SU_1(0) = 0.98$ ,  $SC_1(0) = 0.01$ ,  $IU_1(0) = 0.01$ ,  $IC_1(0) = RU_1(0) = RC_1(0) = 0$ ,  $SU_2(0) = 1.0$ ,  $SC_2(0) = IU_2(0) = IC_2(0) = RU_2(0) = RC_2(0) = 0$ .

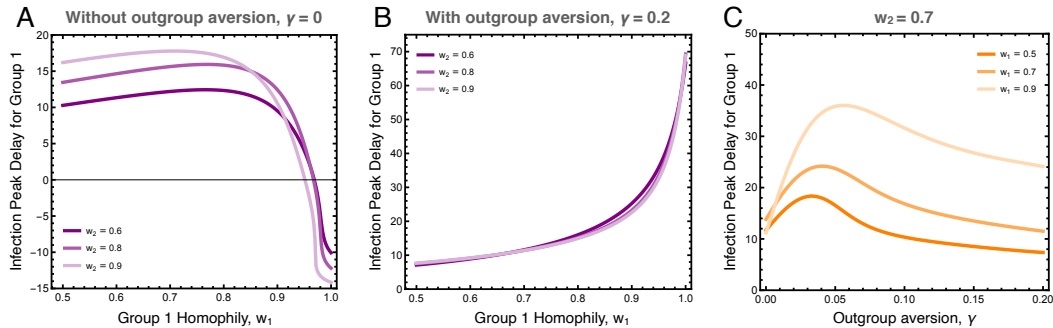

FIGURE 5. Difference in the timing of the peak infection rates between groups. These plots show the extent to which the peak in group 1 lags behind the peak in group 2. The first two plots show the peak delay for group 1 as a function of group 1 homophily, (A) with and (B) without outgroup aversion,  $\gamma$ . The third plot (C) more systematically varies outgroup aversion, for several values of group 1 homophily and moderate group 2 homophily,  $w_2 = 0.7$ . Other parameters used:  $\tau_U = 0.3$ ,  $\tau_C = 0.069$ ,  $\rho = 0.07$ ,  $\alpha_2 = 0.1$ ,  $\alpha_1 = 0.001$ ,  $\beta = 0.3$ ,  $\delta = 0$ .

280 Both population structure and social identity influence who interacts with whom, af-  
 281 fecting disease transmission, and who learns from whom, affecting behavior change. We  
 282 have highlighted two of these forces—homophily and outgroup aversion—and shown  
 283 their dramatic influence on disease dynamics in a simple model.

284 In terms of social interaction and behavior adoption dynamics, group identity exerts  
 285 its influence by way of homophily, a powerful social force. Aral et al. (2009), for ex-  
 286 ample, showed that homophily accounted for more than 50% of contagion in a natural  
 287 experiment on behavioral adoption. The effect of homophily on diffusion dynamics can  
 288 be variable. For example, homophily can slow down convergence toward best responses  
 289 in strategic networks (Golub and Jackson, 2012). This can be critical when the time  
 290 scales of learning and infection are different. Homophily can also lower the threshold for  
 291 desirability (or the selective advantage) required for adoption of a behavior. Creanza and  
 292 Feldman (2014) showed that homophily and selection can have balancing effects—the  
 293 selective advantage of a trait does not need to be as high to spread when it is trans-  
 294 mitted assortatively by its bearers. In the case of our coupled-contagion model, strong  
 295 homophily interferes with the adaptive adoption of protective behavior. Centola (2011)  
 296 showed that homophily can increase the rate of adoption of health behaviors, but his  
 297 experimental population could assort only on positive cues, and had no ability to signal  
 298 or perceive group identity.

299 Consider the observed adoption dynamics under differential homophily. When the  
 300 homophily of group 1 is less than group 2, group 1 can be interpreted as “frontline”  
 301 workers, who are exposed to a broader cross-section of the population by nature of their  
 302 work. Outgroup avoidance of this group’s adopted protective behavior can arise if there  
 303 are status differentials across the groups. Prestige bias, the tendency to adopt behaviors

304 associated with high-status individuals, is a mechanism that can drive differential uptake  
305 of novel behavior by different groups (Boyd and Richerson, 1985), for which there is quite  
306 broad support (Jiménez and Mesoudi, 2019). When both groups are highly homophilous  
307 and outgroup aversion is strong, the resulting dynamics suggest the case of negative  
308 partisanship, a type of outgroup aversion in which partisans select actions based not on  
309 explicit policy preferences but in opposition to the outgroup (Abramowitz and Webster,  
310 2016). In this case, differences in the relative size of the epidemic will be driven purely  
311 by differences in the rates of preventative behavior adoption by the two groups, including  
312 those differences induced by outgroup aversion.

313 Incorporating adaptive behavior into epidemic models has been shown to significantly  
314 alter dynamics (Fenichel et al., 2011). Prevalence-elastic behaviors (Funk et al., 2010)  
315 are those behaviors that increase with the growth of an epidemic. While these behav-  
316 iors may be protective, they can also lead to cycling of incidence, which can prolong  
317 epidemics. Similarly, the adoption of some putatively-protective behaviors that are ac-  
318 tually ineffective can be driven by the existence of an epidemic when the cost of adoption  
319 is sufficiently low (Tanaka et al., 2009). We have shown in this paper that group-identity  
320 processes can have large effects, leading groups that would otherwise respond adaptively  
321 to the threat of an epidemic to behave in ways that put them, and the broader popula-  
322 tions in which they are embedded, at risk.

323 The context of the ongoing COVID-19 pandemic provides some interesting and timely  
324 perspective on the relationship between behavior, adaptive or otherwise, and transmis-  
325 sion dynamics. While there remains much uncertainty about the infection fatality ratio  
326 of COVID-19, and how this varies according to individual, social, and environmental  
327 context, it is clear that the great majority of infections do not lead to death (Russell  
328 et al., 2020; Meyerowitz-Katz and Merone, 2020). Furthermore, the extensive presymp-  
329 tomatic (or even asymptomatic) transmission of the SARS-CoV-2 (He et al., 2020; Li  
330 et al., 2020; Arons et al., 2020) is likely to reduce associations between behavior and local  
331 infection rates. We expect that such a situation will not induce strong prevalence-elastic  
332 behavioral responses, and that the sorts of identity-based responses we describe here will  
333 dominate the behavioral effects on transmission.

334 How do we intervene in a way to offset the pernicious effects of negative partisanship on  
335 the adoption of adaptive behavior? While it may seem obvious, strategies for spreading  
336 efficacious protective behaviors in a highly-structured population with strong outgroup  
337 aversion will require weakening the association between protective behaviors and par-  
338 ticular subgroups of the population. Given that we are writing this during a global  
339 pandemic in which perceptions and behaviors are highly polarized along partisan lines,  
340 attempts to mitigate partisanship in adaptive behavioral responses seem paramount to  
341 support.

342 The models we have analyzed in this paper are broad simplifications of the coupled  
343 dynamics of behavior-change and infection. It would therefore be imprudent to use  
344 them to make specific predictions. The goal of this approach is to develop strategic  
345 models in the sense of Holling (1966), sacrificing precision and some realism for general  
346 understanding of the potential interactions between social structure, outgroup aversion,

347 and coupled contagion (Levins, 1966; Smaldino, 2017). Such models provide a scaffold for  
348 the development of richer theories concerning coupled disease and behavioral contagions.

349 ACKNOWLEDGMENTS

350 We thank two anonymous reviewers for helpful comments.

351 AUTHOR CONTRIBUTIONS

352 PES led the work on model conceptualization and analysis, with extensive contribution  
353 from JHJ. Both authors wrote and edited the manuscript.

354 FINANCIAL SUPPORT

355 This research is part of a project supported by NSF RAPID award BCS-2028160.

356 CONFLICT OF INTEREST

357 n/a

358 RESEARCH TRANSPARENCY AND REPRODUCIBILITY

359 n/a

360 REFERENCES

- 361 Abramowitz, A. I. and Webster, S. (2016). The rise of negative partisanship and the  
362 nationalization of U.S. elections in the 21st century. *Electoral Studies*, 41:12–22.
- 363 Acerbi, A. (2019). *Cultural Evolution in the Digital Age*. Oxford University Press.
- 364 Aral, S., Muchnika, L., and Sundararajana, A. (2009). Distinguishing influence-based  
365 contagion from homophily-driven diffusion in dynamic networks. *Proceedings of the*  
366 *National Academy of Sciences, USA*, 106(51):21544–21549.
- 367 Arons, M. M., Hatfield, K. M., Reddy, S. C., Kimball, A., James, A., Jacobs, J. R.,  
368 Taylor, J., Spicer, K., Bardossy, A. C., Oakley, L. P., Tanwar, S., Dyal, J. W., Harney,  
369 J., Chisty, Z., Bell, J. M., Methner, M., Paul, P., Carlson, C. M., McLaughlin, H. P.,  
370 Thornburg, N., Tong, S., Tamin, A., Tao, Y., Uehara, A., Harcourt, J., Clark, S.,  
371 Brostrom-Smith, C., Page, L. C., Kay, M., Lewis, J., Montgomery, P., Stone, N. D.,  
372 Clark, T. A., Honein, M. A., Duchin, J. S., and Jernigan, J. A. (2020). Presymptomatic  
373 SARS-CoV-2 infections and transmission in a skilled nursing facility. *New England*  
374 *Journal of Medicine*, 382(22):2081–2090.
- 375 Arthur, R. F., Gurley, E. S., Salje, H., Bloomfield, L. S. P., and Jones, J. H. (2017).  
376 Contact structure, mobility, environmental impact and behaviour: the importance of  
377 social forces to infectious disease dynamics and disease ecology. *Philosophical Trans-*  
378 *actions of the Royal Society B: Biological Sciences*, 372(1719):1–9.
- 379 Bass, F. M. (1969). A new product growth for model consumer durables. *Management*  
380 *Science*, 15(5):215–227.
- 381 Bauch, C. T. and Earn, D. J. (2004). Vaccination and the theory of games. *Proceedings*  
382 *of the National Academy of Sciences*, 101(36):13391–13394.



- 383 Berger, J. and Heath, C. (2007). Where consumers diverge from others: Identity signal-  
384 ing and product domains. *Journal of Consumer Research*, 34(2):121–134.
- 385 Berger, J. and Heath, C. (2008). Who drives divergence? identity signaling, outgroup  
386 dissimilarity, and the abandonment of cultural tastes. *Journal of Personality and*  
387 *Social Psychology*, 95(3):593.
- 388 Bishop, B. (2009). *The big sort: Why the clustering of like-minded America is tearing*  
389 *us apart*. Houghton Mifflin Harcourt.
- 390 Boyd, R. and Richerson, P. J. (1985). *Culture and the evolutionary process*. University  
391 of Chicago press, Chicago.
- 392 Cavalli-Sforza, L. L. and Feldman, M. (1981). *Cultural transmission and evolution: A*  
393 *quantitative approach*, volume 16 of *Monographs in Population Biology*. Princeton  
394 University Press, Princeton.
- 395 Centola, D. (2011). An experimental study of homophily in the adoption of health  
396 behavior. *Science*, 334(6060):1269–1272.
- 397 Centola, D. (2018). *How behavior spreads: The science of complex contagions*. Princeton  
398 University Press.
- 399 Creanza, N. and Feldman, M. W. (2014). Complexity in models of cultural niche con-  
400 struction with selection and homophily. *Proceedings of the National Academy of Sci-*  
401 *ences*, 111(Supplement 3):10830–10837.
- 402 Diekmann, O., Heesterbeek, J. A. P., and Metz, J. A. J. (1990). On the definition and  
403 the computation of the basic reproduction ratio  $r_0$  in models for infectious diseases in  
404 heterogeneous populations. *Journal of Mathematical Biology*, 28(4):365–382.
- 405 Epstein, J. M., Parker, J., Cummings, D., and Hammond, R. A. (2008). Coupled con-  
406 tagion dynamics of fear and disease: mathematical and computational explorations.  
407 *PLoS One*, 3(12).
- 408 Fast, S. M., González, M. C., Wilson, J. M., and Markuzon, N. (2015). Modelling the  
409 propagation of social response during a disease outbreak. *Journal of The Royal Society*  
410 *Interface*, 12(104):20141105.
- 411 Fenichel, E. P., Castillo-Chavez, C., Ceddia, M. G., Chowell, G., Parra, P. A. G., Hick-  
412 ling, G. J., Holloway, G., Horan, R., Morin, B., Perrings, C., Springborn, M., Ve-  
413 lazquez, L., and Villalobos, C. (2011). Adaptive human behavior in epidemiological  
414 models. *Proceedings of the National Academy of Sciences*, 108(15):6306–6311.
- 415 Fu, F., Christakis, N. A., and Fowler, J. H. (2017). Dueling biological and social conta-  
416 gions. *Scientific Reports*, 7:43634.
- 417 Funk, S., Salathé, M., and Jansen, V. A. (2010). Modelling the influence of human  
418 behaviour on the spread of infectious diseases: a review. *Journal of the Royal Society*  
419 *Interface*, 7(50):1247–1256.
- 420 Golub, B. and Jackson, M. O. (2012). How homophily affects the speed of learning and  
421 best-response dynamics. *The Quarterly Journal of Economics*, 127(3):1287–1338.
- 422 He, X., Lau, E. H. Y., Wu, P., Deng, X., Wang, J., Hao, X., Lau, Y. C., Wong, J. Y.,  
423 Guan, Y., Tan, X., Mo, X., Chen, Y., Liao, B., Chen, W., Hu, F., Zhang, Q., Zhong,  
424 M., Wu, Y., Zhao, L., Zhang, F., Cowling, B. J., Li, F., and Leung, G. M. (2020). Tem-  
425 poral dynamics in viral shedding and transmissibility of COVID-19. *Nature Medicine*.



- 426 Hébert-Dufresne, L., Mistry, D., and Althouse, B. M. (2020). Spread of infectious disease  
427 and social awareness as parasitic contagions on clustered networks. *arXiv preprint*  
428 *arXiv:2003.10604*.
- 429 Heffernan, J., Smith, R., and Wahl, L. (2005). Perspectives on the basic reproduction  
430 ratio. *Journal of the Royal Society Interface*, 2:281–293.
- 431 Henrich, J. (2015). *The Secret of Our Success: How Culture Is Driving Human Evolution,*  
432 *Domesticating Our Species, and Making Us Smarter*. Princeton University Press,  
433 Princeton.
- 434 Hogg, M. A. and Abrams, D. (2007). Intergroup behavior and social identity. *The Sage*  
435 *handbook of social psychology: Concise student edition*, pages 335–360.
- 436 Holling, C. S. (1966). The strategy of building models of complex ecological systems. In  
437 Watt, K. E. F., editor, *Systems Analysis in Ecology*, pages 195–214. Academic Press.
- 438 Jiménez, A. V. and Mesoudi, A. (2019). Prestige-biased social learning: current evidence  
439 and outstanding questions. *Palgrave Communications*, 5(1):20.
- 440 Keeling, M. J. and Rohani, P. (2007). *Modeling Infectious Diseases in Humans and*  
441 *Animals*. Princeton University Press, Princeton.
- 442 Kermack, W. O. and McKendrick, A. G. (1927). A contribution to the mathematical  
443 theory of epidemics. *Proceedings of the Royal Society of London A*, 115:700–721.
- 444 Klein, E. (2020). *Why we're polarized*. Simon and Schuster.
- 445 Lau, J. T., Griffiths, S., Choi, K.-c., and Lin, C. (2010). Prevalence of preventive  
446 behaviors and associated factors during early phase of the H1N1 influenza epidemic.  
447 *American Journal of Infection Control*, 38(5):374–380.
- 448 Levins, R. (1966). The strategy of model building in population biology. *American*  
449 *Scientist*, 54(4):421–431.
- 450 Li, R., Pei, S., Chen, B., Song, Y., Zhang, T., Yang, W., and Shaman, J. (2020). Substan-  
451 tial undocumented infection facilitates the rapid dissemination of novel coronavirus  
452 (sars-cov2). *Science*, 368(6490):489–493.
- 453 Mason, L. (2018). *Uncivil agreement: How politics became our identity*. University of  
454 Chicago Press.
- 455 McPherson, M., Smith-Lovin, L., and Cook, J. M. (2001). Birds of a feather: Homophily  
456 in social networks. *Annual Review of Sociology*, 27:415–444.
- 457 Mehta, R. S. and Rosenberg, N. A. (2020). Modeling anti-vaccine sentiment as a cultural  
458 pathogen. *Evolutionary Human Sciences*.
- 459 Meyerowitz-Katz, G. and Merone, L. (2020). A systematic review and meta-analysis of  
460 published research data on COVID-19 infection-fatality rates. *International Journal*  
461 *of Infectious Diseases*.
- 462 Morris, M. (1991). A log-linear modeling framework for selective mixing. *Mathematical*  
463 *Biosciences*, 107(2):349–377.
- 464 Moya, C., Cruz y Celis Peniche, P., Kline, M. A., and Smaldino, P. E. (2020). Dynam-  
465 ics of behavior change in the COVID world. *American Journal of Human Biology*,  
466 32:e23485.
- 467 Russell, T. W., Hellewell, J., Jarvis, C. I., van Zandvoort, K., Abbott, S., Ratnayake,  
468 R., group, C. C.-. w., Flasche, S., Eggo, R. M., Edmunds, W. J., and Kucharski,  
469 A. J. (2020). Estimating the infection and case fatality ratio for coronavirus disease

- 470 (COVID-19) using age-adjusted data from the outbreak on the Diamond Princess  
471 cruise ship, February 2020. *Eurosurveillance*, 25(12):2000256.
- 472 Salathé, M. and Bonhoeffer, S. (2008). The effect of opinion clustering on disease out-  
473 breaks. *Journal of The Royal Society Interface*, 5(29):1505–1508.
- 474 Seale, H., Heywood, A. E., Leask, J., Sheel, M., Thomas, S., Durrheim, D. N., Bolsewicz,  
475 K., and Kaur, R. (2020). COVID-19 is rapidly changing: Examining public perceptions  
476 and behaviors in response to this evolving pandemic. *PLOS ONE*, 15(6):e0235112.
- 477 Smaldino, P. E. (2017). Models are stupid, and we need more of them. In Vallacher,  
478 R. R., Read, S. J., and Nowak, A., editors, *Computational social psychology*, pages  
479 311–331. Routledge.
- 480 Smaldino, P. E. (2019). Social identity and cooperation in cultural evolution. *Behavioural*  
481 *Processes*, 161:108–116.
- 482 Smaldino, P. E., Janssen, M. A., Hillis, V., and Bednar, J. (2017). Adoption as a social  
483 marker: Innovation diffusion with outgroup aversion. *The Journal of Mathematical*  
484 *Sociology*, 41(1):26–45.
- 485 Taber, C. S., Cann, D., and Kucsova, S. (2009). The motivated processing of political  
486 arguments. *Political Behavior*, 31(2):137–155.
- 487 Tanaka, M. M., Kendal, J. R., and Laland, K. N. (2009). From traditional medicine  
488 to witchcraft: Why medical treatments are not always efficacious. *PLOS ONE*,  
489 4(4):e5192.
- 490 Tanaka, M. M., Kumm, J., and Feldman, M. W. (2002). Coevolution of pathogens and  
491 cultural practices: a new look at behavioral heterogeneity in epidemics. *Theoretical*  
492 *Population Biology*, 62(2):111–119.
- 493 Tolles, J. and Luong, T. (2020). Modeling epidemics with compartmental models. *JAMA*,  
494 323:2515–2516.
- 495 van den Driessche, P. and Watmough, J. (2002). Reproduction numbers and sub-  
496 threshold endemic equilibria for compartmental models of disease transmission. *Math-*  
497 *ematical Biosciences*, 180:29–48.
- 498 van Kessel, P. and Quinn, D. (2020). Both Republicans and Democrats cite masks as  
499 a negative effect of COVID-19, but for very different reasons. *Pew Research Center*,  
500 <https://pewrsr.ch/3jHpDT7>.
- 501 Verelst, F., Willem, L., and Beutels, P. (2016). Behavioural change models for infectious  
502 disease transmission: a systematic review (2010–2015). *Journal of The Royal Society*  
503 *Interface*, 13(125):20160820.
- 504 Zhang, L., Kong, Y., and Chang, H. (2015). Media use and health behavior in H1N1  
505 flu crisis: The mediating role of perceived knowledge and fear. *Atlantic Journal of*  
506 *Communication*, 23(2):67–80.

507

508

509

## APPENDIX (ONLINE SUPPLEMENT) Coupled Dynamics of Behavior and Disease Contagion Among Antagonistic Groups

510

### APPENDIX A. THE SIR MODEL WITH HOMOPHILY

511 We extended the SIR model to explore scenarios where individuals assort based on  
512 identity, as described in the main text. Here we present some additional analyses of this  
513 model.

514 Figure S1 illustrates that when an infection breaks out in group 1, homophily can delay  
515 the outbreak of the epidemic in group 2. Homophily for each group works somewhat  
516 synergistically, but the effect is dominated by  $w_2$ . This is because the infection spreads  
517 rapidly in a homophilous group 1, and if group 2 is not homophilous its members will  
518 rapidly become infected. However, if group 2 is homophilous, its members can avoid the  
519 infection for longer, particularly when group 1 is also homophilous.

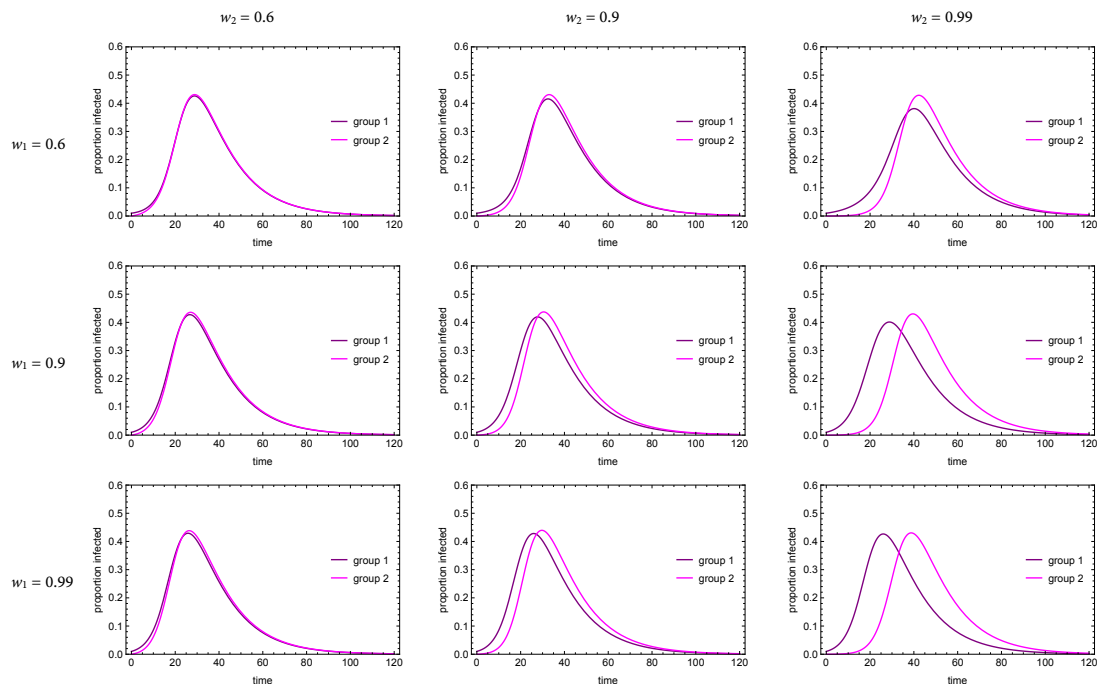

FIGURE S1. Infection dynamics in the SIR model with asymmetric homophily. Here  $\tau = 0.3$ ,  $\rho = 0.07$ .

520

521

522

523

524

We also explored a scenario where  $R_0$  for the basic model was very close to 1, indicating a small epidemic (we used  $R_0 = 1.14$ ; Figure S2). Note that this calculation of  $R_0$  does not account for homophily; we derive  $R_0$  for the homophily model in the SI Appendix and show that this is a reasonable approximation. When homophily was low ( $w = 0.6$ ), the populations mixed a lot. The proportion of infected individuals in group 1 briefly fell,

525 as the majority of new infected individuals were in group 2. However, the groups quickly  
 526 matched their pace and experienced the outbreak in tandem. When homophily was high  
 527 ( $w = 0.99$ ), not only did group 2 experience a delayed outbreak, it also experienced a  
 528 substantially lower peak infection rate, because the total number of infected individuals  
 529 at the start of its outbreak was so much lower than that experienced by group 1. Thus,  
 530 homophily can serve not only to delay an epidemic, but also to reduce it in the cases of  
 531 lower transmissibility infections.

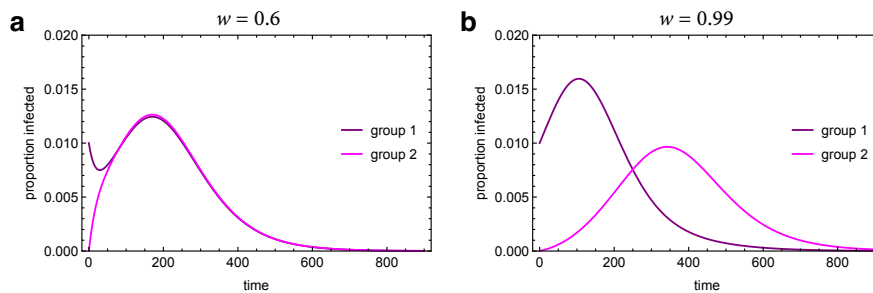

FIGURE S2. Infection dynamics in the SIR model with homophily when  $R_0$  is close to 1. Here  $\tau = 0.08$ ,  $\rho = 0.07$ ,  $w_1 = w_2 = w$ .

532

## APPENDIX B. BASIC REPRODUCTION NUMBER

533 We can calculate the basic reproduction number,  $R_0$ , for the homophily model. We  
 534 employ the next-generation matrix approach described by Heffernan et al. (2005), which  
 535 concisely summarizes the ideas for calculating  $R_0$  in structured populations articulated  
 536 by, e.g., Diekmann et al. (1990) and van den Driessche and Watmough (2002).

537 Following the notation of Heffernan et al. (2005), the next generation matrix  $\mathbf{G}$  is  
 538 comprised of two component matrices:  $\mathbf{F}$  and  $\mathbf{V}^{-1}$ , where

$$(1) \quad \mathbf{F} = \left[ \frac{\partial F_i(x_0)}{\partial x_j} \right],$$

539 and

$$(2) \quad \mathbf{V} = \left[ \frac{\partial V_i(x_0)}{\partial x_j} \right].$$

540 These are square matrices of the partial derivatives of new infections ( $F_i$ ) and transfers  
 541 between different compartments ( $V_i$ ). The rank of these matrices is the number of  
 542 distinct classes of infections.  $x_0$  is the disease-free equilibrium state. This matrix should  
 543 be non-negative, irreducible, and primitive.

544 is given by the dominant eigenvalue of the matrix  $\mathbf{G} = \mathbf{F}\mathbf{V}^{-1}$ .

545 For the homophily model, the only two equations that yield new infections are those  
 546 for  $\dot{I}_1$  and  $\dot{I}_2$ :

$$(3) \quad \frac{dI_1}{dt} = \tau S_1 (w_1 I_1 + (1 - w_1) I_2) - \rho I_1$$

$$(4) \quad \frac{dI_2}{dt} = \tau S_2 (w_2 I_2 + (1 - w_2) I_1) - \rho I_2$$

547 Applying the next-generation-matrix approach described above to these equations,  
 548 and noting that in the disease-free equilibrium  $S_1 + S_2 = 1$ , we get the next-generation  
 549 matrix:

$$(5) \quad \mathbf{G} = \begin{pmatrix} \frac{S_1 \tau w_1}{\rho} & \frac{S_1 \tau (1 - w_1)}{\rho} \\ \frac{S_2 \tau (1 - w_2)}{\rho} & \frac{S_2 \tau w_2}{\rho} \end{pmatrix}.$$

550 Letting  $S_2 = 1 - S_1$  in the disease-free equilibrium, the larger of the two eigenvalues  
 551 of this matrix is:

$$(6) \quad R_0 = \frac{\tau}{2\rho} \left( \sqrt{S_1^2 w_1^2 + 2(1 - S_1) S_1 w_1 w_2 - 4(1 - S_1) S_1 w_1 + (1 - S_1)^2 w_2^2 - 4(1 - S_1) S_1 w_2 + 4(1 - S_1) S_1 + \rho^2 S_1 w_1 + \rho^2 (1 - S_1) w_2} \right)$$

552 This relationship is greatly simplified by assuming uniform homophily ( $w_1 = w_2 = w$ ):

$$(7) \quad R_0 = \frac{\tau}{2\rho} (w + \sqrt{S_1^2 (8w - 4) + S_1 (4 - 8w) + w^2}).$$

553 Note that if we collapse the structure of the population such that  $S_1 = 1$  (which also  
 554 implies that  $w = 1$ ), then equation 7 reduces to  $R_0 = \tau/\rho$ , the standard definition for the  
 555 basic reproduction number in an unstructured SIR model (Keeling and Rohani, 2007).

556 We see from figure S3 that structure and homophily (in the absence of coupled adap-  
 557 tive behavior and outgroup aversion) are actually somewhat protective from an epidemic  
 558 perspective.  $R_0$  is lowest when the population is evenly split between the two groups and  
 559 when homophily is extreme. This makes sense since structure generally slows epidemics  
 560 by subdividing the potential for contacts and thereby slowing mixing (Arthur et al.,  
 561 2017).

## 562 APPENDIX C. COUPLED CONTAGION DYNAMICS

563 Here we present an extended version of the full model analysis presented in the main  
 564 text, that includes intermediate homophily of  $w_i = 0.9$ . Analysis with no outgroup  
 565 aversion is shown in Figure S4, and with outgroup aversion is shown in Figure S5.  
 566 The figures illustrate how homophily and outgroup aversion can interact to produce  
 567 unintuitive dynamics. When both forces are present, an infection that begins in group 1  
 568 can peak earlier and stronger in group 2, followed by a smaller peak in the group where  
 569 it began.

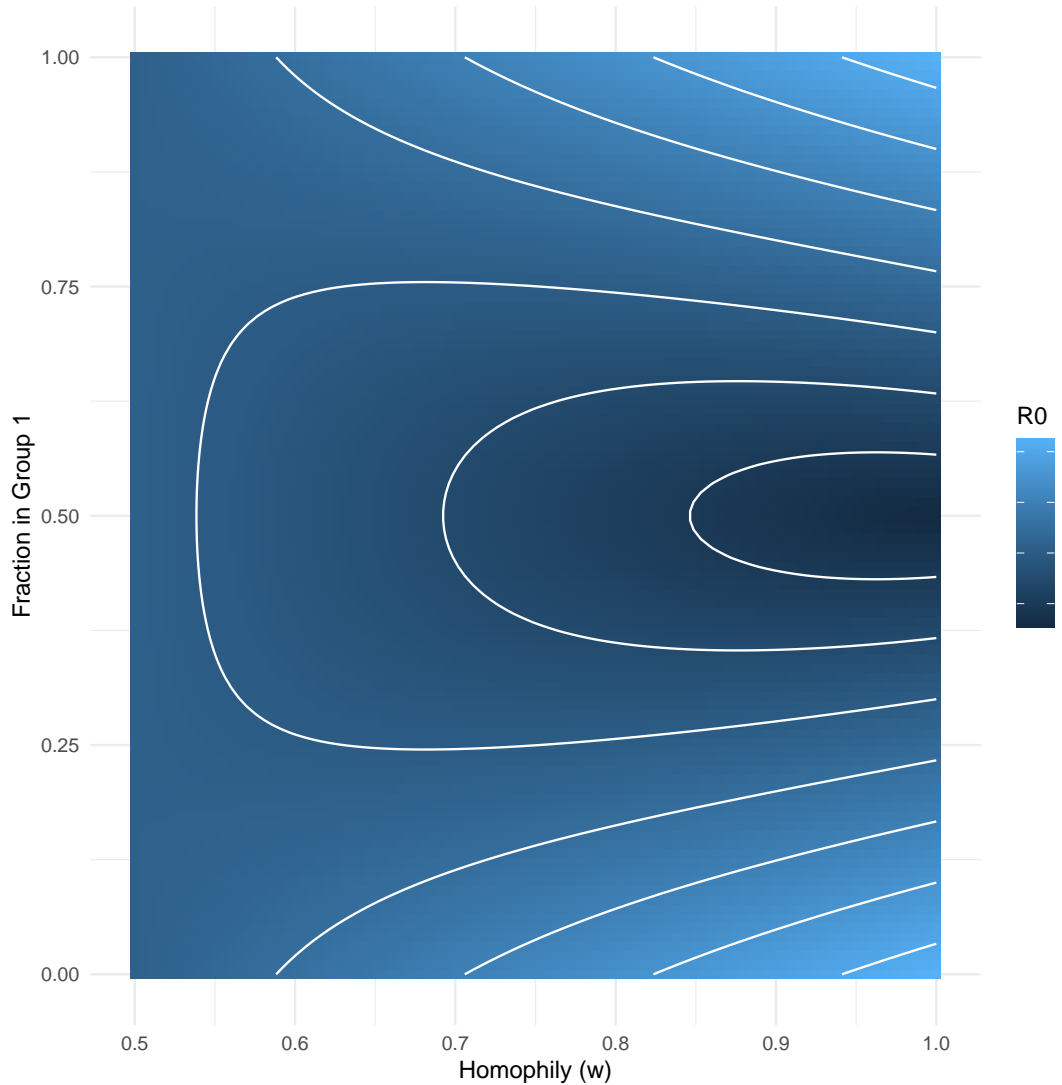

FIGURE S3.  $R_0$  for the uniform-homophily model (Equation 7) as a function of the strength of homophily ( $w$ ) and the initial population structure.  $\tau = 0.3$ ,  $\rho = 0.07$ .

570

#### APPENDIX D. ANALYSIS OF BEHAVIORAL EFFICACY

571 In the main text analysis, we assumed that the adopted behavior reduced the trans-  
572 mission to below the threshold for  $R_0 < 1$ . In other words, if everyone immediately and  
573 universally adopted the behavior at the start of the outbreak, it would not become an  
574 epidemic. Although we view this as a reasonable assumption (that is, the efficacy of the

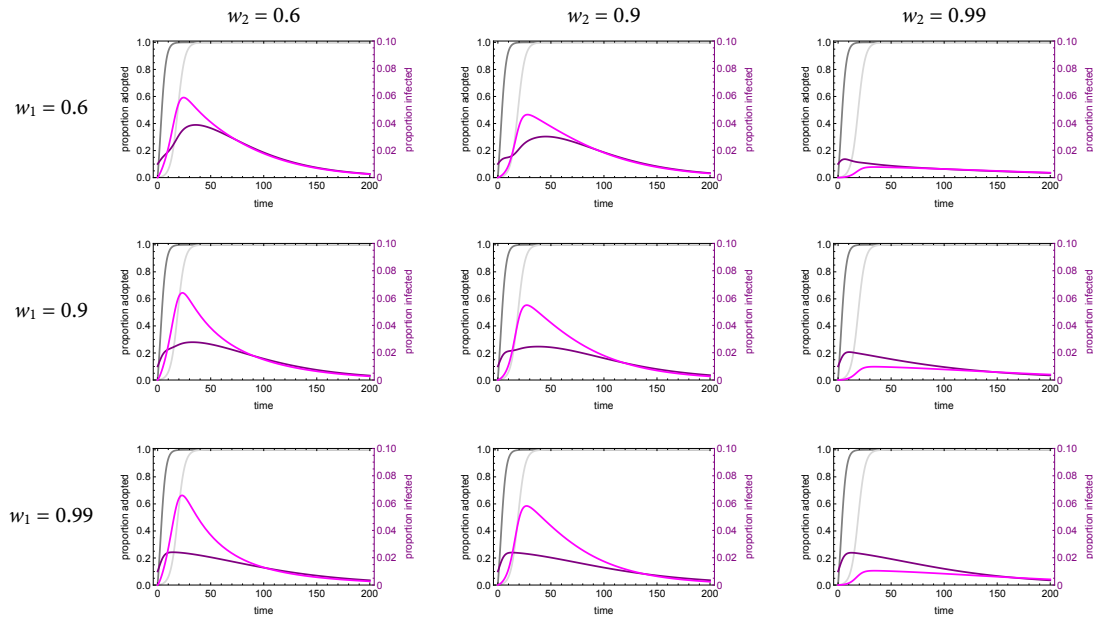

FIGURE S4. Coupled dynamics of the full model without outgroup aversion ( $\gamma = 0$ ) for with varying homophily. Darker lines are group 1, lighter lines are group 2. Parameters used:  $\tau_U = 0.3$ ,  $\tau_C = 0.069$ ,  $\rho = 0.07$ ,  $\alpha_2 = 0.1$ ,  $\alpha_1 = 0.001$ ,  $\beta = 0.3$ ,  $\delta = 0$ .

575 behavior is reasonable, not the expectation that it will be either immediately or univer-  
 576 sally adopted), it is also worth examining what happens with the spread of behaviors  
 577 that reduce transmission, but not below epidemic levels. Figure S6 illustrates the model  
 578 dynamics for varying levels of behavior efficacy ( $\tau_C$ ) with and without outgroup aversion  
 579 and for both weak and strong homophily.

580 Without outgroup aversion ( $\gamma = 0$ ), the effect is clear: the more efficacious the behav-  
 581 ior, the smaller the epidemic. This occurs because the behavior spreads effectively. With  
 582 outgroup aversion, two things happen. First, the more effectively the behavior reduces  
 583 transmission (that is, the smaller  $\tau_C$  is), the smaller the overall epidemic, but with an  
 584 effect that is much stronger in group 1. In group 2, the effect of increased behavior  
 585 efficacy is relatively small, because adoption is reduced and delayed. Second, the better  
 586 the behavior reduces transmission, the bigger the delay in when group 1 experiences a  
 587 “second wave.” This illustrates that the dynamics of disease transmission can become  
 588 quite complex when even simple assumptions about behavior and group structure are  
 589 considered.



COUPLED DYNAMICS OF BEHAVIOR AND DISEASE

23

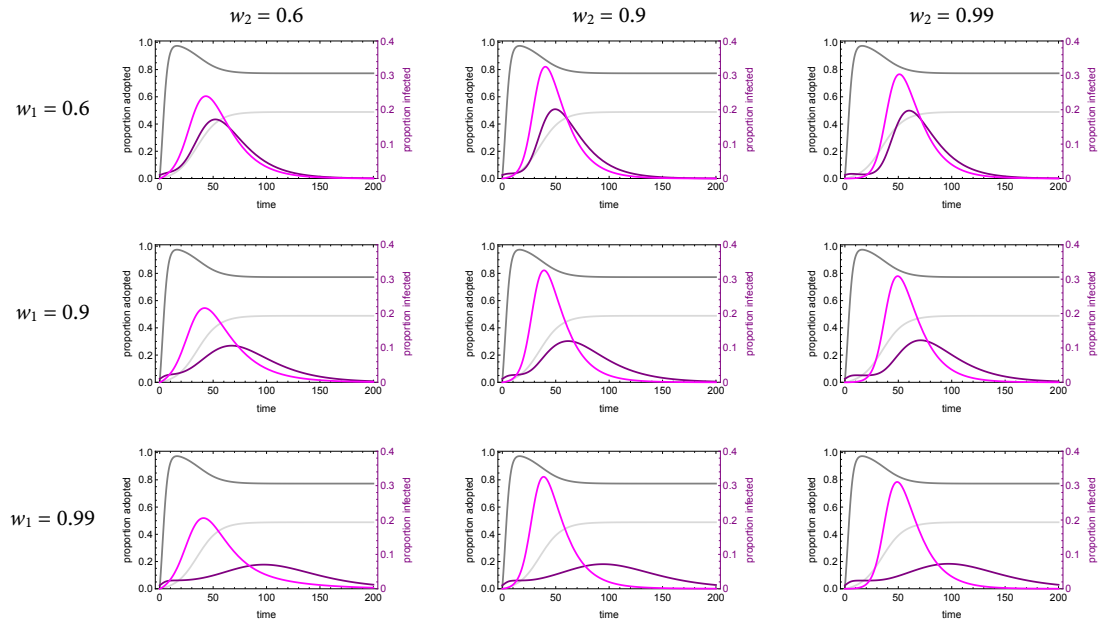

FIGURE S5. Coupled dynamics of the full model with outgroup aversion ( $\gamma = 0.2$ ) for with varying homophily. Darker lines are group 1, lighter lines are group 2. Parameters used:  $\tau_U = 0.3$ ,  $\tau_C = 0.069$ ,  $\rho = 0.07$ ,  $\alpha_2 = 0.1$ ,  $\alpha_2 = 0.001$ ,  $\beta = 0.3$ ,  $\delta = 0$ .

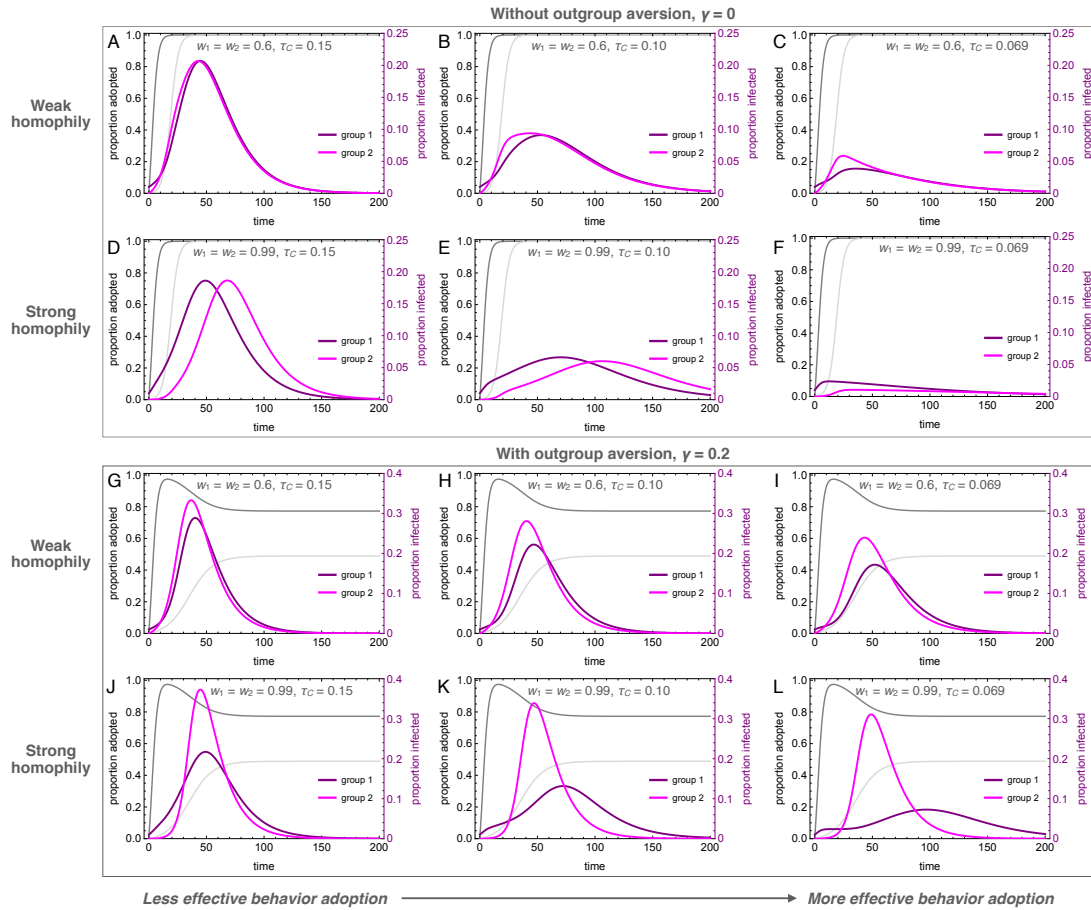

FIGURE S6. Coupled dynamics of the full model for varying levels of behavior efficacy,  $\tau_C = \{0.15, 0.1, 0.069\}$ , where only the last case would provide  $R_0 < 1$  if immediately and universally adopted at the start of the outbreak. We provide analyses with and without outgroup aversion and for both weak and strong homophily. Darker lines are group 1, lighter lines are group 2. Parameters used:  $\tau_U = 0.3$ ,  $\rho = 0.07$ ,  $\alpha_2 = 0.1$ ,  $\alpha_2 = 0.001$ ,  $\beta = 0.3$ ,  $\delta = 0$ .
